# Supplementary material for: The challenge of intracellular antibiotic accumulation, a function of fluoroquinolone influx versus bacterial efflux
Source: PubMed Central journal article supplement (PMC7189378; doi:10.1038/s42003-020-0929-x), 2020-04-28
Supplement: 42003_2020_929_MOESM2_ESM.pdf [file 42003_2020_929_MOESM2_ESM.pdf]

## **Description of Additional Supplementary Files**

**File Name: Supplementary Data 1**

**Description:** This document contains the crude results used for the main figures. This is explained in the section "Statistics and Reproducibility".
